# Supplementary material for: Integrated Phenotypic, Nutritional, and SSR Marker Analyses Reveal Genetic Diversity and Guide Germplasm Utilization in Lotus corniculatus
Source: Research Square preprint supplement (doi:10.21203/rs.3.rs-7373284/v1), 2025-10-03
Supplement: Supplementary file 1 [file ad8e3432b48f13cc9547474c.xlsx]

## Sheet: S1
Table S1 Optimized factor levels for the SSR-PCR system in Lotus corniculatus
Sample	Taq DNA Polymerase(U)	dNTPs(mmol/L)	primer(μmol/L)	Mg2+(mmol/L)	DNA(ng)
1	0.75	0.1	0.2	1	20
2	0.75	0.2	0.4	2	40
3	0.75	0.3	0.6	3	60
4	0.75	0.4	0.8	4	80
5	1	0.1	0.4	3	80
6	1	0.2	0.2	4	60
7	1	0.3	0.8	1	40
8	1	0.4	0.6	2	20
9	1.25	0.1	0.6	4	40
10	1.25	0.2	0.8	3	20
11	1.25	0.3	0.2	2	80
12	1.25	0.4	0.4	1	60
13	1.5	0.1	0.8	2	60
14	1.5	0.2	0.6	1	80
15	1.5	0.3	0.4	4	20
16	1.5	0.4	0.2	3	40

## Sheet: S2
Table S2 Sequences and annealing temperatures of polymorphic SSR primers
Primer sample	Forward primer	Reverse primer	Annealing temperature(℃)
chr0 4872	ACCTTTTCCACGTGGCTTTT	GAGAGAGCAGGGAAGGGAGT	60.9
chr5 3453	AGGTTCTGCACCACTTGCTT	TGTGGGGTGTCTGGAAAAAT	59.9
chr5 2279	CTTAGCCCCTCCCTGTAACC	TCCACATGATCGCTGGAATA	60
chr5 3457	TTGGGGAGACTGCAAAAAGT	TAGAGGGAGGGTGGGAGAGT	59.7
chr4 2393	TAAATGGAATCGTGAACGCA	AAAGTTCTAAGCCATTGAAAATTG	60.1
chr0 9069	AGTGCCAGATTTTTAGGGGC	CCATCTCAACATACGGTTTCC	60.5
chr6 130	GCTCCTTTCCTGCACTGAAT	AATCCTAGCTTCCAGCTCCA	59.4
chr0 14344	TAACGAGTTCGCGTAGGTCC	GAAATCACGGAGACCGTTGT	60.3
chr2 4161	TGGGAGAGCATATGCAAACA	TCCACCTTCAAAGTCAAGCA	60.2
chr3 3963	GGGGTTGTCTAAATGATCCAA	AAGCTGTTGGGTAAGGGTCA	58.8
chr4 2109	CTCGTGTGATGCAGGAAAAA	AGGTTGAGACTTGCAACATTGA	59.8
chr5 724	GCATGACTTCCACCGATTTT	AGCAGAAGGAACACCACTCAA	59.9
chr0 15876	AGAAAATGGCTTTTAGGCCC	CAAGAGGTAACCCCTCCTCC	59.6
chr0 6664	CGCACACACGTTCTTCACTT	TGTTGTTAAGCCCACAACCA	60
chr1 2455	GATCATGTCACAAAAGGACGTT	CCGAACTATGCACGAAGGAT	59
chr5 3797	TGGTGTAAGTGGAGTTGTTGTG	GTTAGCGGACAAGTGCCTTC	58.6
chr3 2976	GGTTGAGGAGATGAATCGGA	AACAGCATCAGGGGACAAAC	60
chr6 1459	TGCACCATTCCATCATGTTT	GCCACCATGAAGGTTCAACT	59.8
chr5 3017	TGAAGCATGAACAATGCACA	AGATGCAGCAAATCAACCAA	59.8
chr0 17962	GGATGACAGAAAATTTGGGG	ATGTGGCAAAATGCATTCAA	59.2
chr0 7339	GTACGGCCATAAGAGGACCA	GTGAGAGGGGGTTGAGTTGA	60
chr0 14998	TGTTTGTGTTGTTAATTTGGCTG	CCTCAGCTTTTACAACCCATTC	60
chr1 83	GGACCACAAACTTACCAACCA	TCGTTGAGTTGAGCTTGCAT	59.7
chr0 17429	TGTCACCTAAGAACCCCCAC	TGATTCCATTTCAGGCTGTG	59.8
chr0 18003	GCGTGTGTTTTACGGACAGA	TTGACACGTAGGATTCTGATGA	59.8
chr4 4327	TCTGATGGTGATCTTGCTGC	GCAACCTCAATCCCTACGAA	60
chr0 12234	GCCCAACCATATTGCTTCAT	TCATTTCTACCACCATCCCC	59.8
chr0 15414	TCTGATTTGGGGACCCATTA	ATTGTGGGCCTCCATGTATC	60.1
chr4 868	GTTGCGGACACTCAACCTTT	CGATTTCGGTGGTGTCACTT	60.2

## Sheet: S3
Table S3 Major morphological agronomic trait measurements of 23 Lotus corniculatus germplasms
Sample	Leaf area (cm2)	Leaf circumference (cm)	Leaf length (cm)	Leaf width (cm)	Stem thickness (mm)	Number of branches	Plant height (cm)
00114	1.063±0.103i	7.283±0.371ij	1.233±0.060jk	1.750±0.078h	0.587±0.153fghi	5.667±1.528ab	10.633±0.809d
00115	1.847±0.233def	9.340±0.594cd	1.547±0.117bcdef	2.180±0.185efg	0.557±0.025ghi	5.000±1.000ab	12.467±0.462cd
00116	2.010±0.178cd	10.010±0.407bc	1.650±0.085bcd	2.337±0.060cde	0.733±0.049bcdefg	4.333±1.528ab	11.800±1.162cd
00420	2.333±0.202b	10.537±0.549b	1.683±0.103bc	2.597±0.075b	0.687±0.074bcdefgh	5.667±1.528ab	11.503±0.550cd
01549	1.380±0.144gh	7.937±0.341ghi	1.327±0.129hij	1.990±0.053g	0.723±0.129bcdefg	4.333±0.577ab	11.357±0.498cd
01885	1.740±0.128 def	8.743±0.226defg	1.493±0.040defg	2.140±0.036efg	0.553±0.049ghi	5.333±2.309ab	10.177±1.099d
01886	1.880±0.036de	8.930±0.182def	1.483±0.038efgh	2.240±0.066def	0.860±0.100b	4.667±0.577ab	15.693±1.923ab
01887	2.860±0.429a	12.047±0.940a	1.963±0.129a	2.930±0.255a	0.560±0.017ghi	5.667±1.155ab	12.603±1.496cd
01888	1.793±0.084 def	9.530±0.234cd	1.523±0.047cdefg	2.367±0.110cde	0.803±0.137bcd	3.333±0.577b	15.013±3.093bc
03046	0.617±0.029j	5.307±0.214k	0.883±0.038l	1.240±0.030i	0.457±0.042i	6.333±1.155a	9.663±0.225e
04670	0.940±0.101i	6.560±0.374j	1.150±0.062k	1.640±0.089h	0.777±0.056bcdef	4.000±1.732ab	11.063±2.008d
04679	2.350±0.260b	11.400±0.602a	1.983±0.139a	2.660±0.173b	0.490±0.020hi	5.667±1.528ab	6.403±0.320f
05689	2.423±0.148b	12.130±0.437a	2.093±0.045a	3.037±0.100a	0.600±0.036efghi	5.333±0.577ab	11.813±1.037cd
05690	1.700±0.096 defg	9.510±0.290cd	1.553±0.059cdef	2.260±0.092cdef	0.637±0.035cdefghi	4.000±1.732ab	10.730±0.956d
07880	1.813±0.186 def	9.467±0.480cd	1.620±0.147bcde	2.263±0.174cdef	0.650±0.118cdefghi	4.667±1.528ab	10.587±0.647d
08515	1.627±0.068efg	9.020±0.344de	1.403±0.051fghi	2.317±0.038cde	0.867±0.100b	4.333±1.528ab	14.220±1.783bc
08516	2.200±0.227bc	10.577±0.610b	1.697±0.115b	2.490±0.182bc	0.8267±0.025bc	5.000±1.732ab	18.963±0.563a
08517	1.910±0.095cde	9.887±0.451bc	1.587±0.067bcde	2.307±0.095cde	0.617±0.061defghi	5.333±1.528ab	10.160±0.850d
08518	1.643±0.181efg	8.160±0.525fgh	1.417±0.072fghi	2.003±0.091g	0.687±0.032bcdefgh	4.000±0.00ab	11.907±0.432d
08519	1.127±0.106hi	7.627±0.407hi	1.300±0.040ijk	1.767±0.147h	1.117±0.335a	5.667±1.528ab	10.147±0.743d
08520	1.650±0.115efg	8.390±0.122efgh	1.370±0.046ghij	2.053±0.104fg	0.763±0.042bcdef	5.000±1.00ab	11.203±1.009cd
08521	2.213±0.153bc	11.657±0.453a	1.960±0.108a	2.447±0.216bcd	0.797±0.059bcdef	4.667±2.082ab	13.940±1.512bc
B08	1.523±0.176fg	8.373±0.410efgh	1.407±0.100fghi	2.030±0.085fg	0.517±0.046hi	5.000±1.00ab	12.063±1.574cd

## Sheet: S4
Table S4 Nutritional quality traits of 23 Lotus corniculatus germplasms
Sample	Ether extract（EE,%）	Crude fiber (CF,%)	Crude protein(CP,g/kg)	Dry matter(DM,%)	Total sugar(%)
00114	4.100±0.057c	15.413±0.350fg	210.627±8.263h	25.0±0.000b	20.977±0.238b
00115	1.620±0.035n	15.807±0.096f	236.263±9.290efg	24.7±0.006bc	16.023±0.365fgh
00116	4.667±0.191b	10.967±0.257no	239.683±5.436efg	21.7±0.006jk	11.943±0.074m
00420	2.317±0.046l	11.597±0.144m	266.507±5.987abc	23.3±0.006efg	15.933±0.335gh
01549	2.723±0.042j	12.067±0.266klm	254.463±5.942cd	22.3±0.006hij	16.707±0.166def
01885	2.487±0.021k	13.150±0.240ij	264.647±5.744abc	21.7±0.006jk	14.673±0.421i
01886	3.420±0.044g	11.967±0.319lm	275.473±11.703a	23.0±0.000fgh	13.587±0.352jk
01887	4.933±0.097a	10.337±0.163o	269.513±6.414ab	21.7±0.006jk	12.613±0.101l
01888	1.923±0.042m	12.640±0.183jkl	260.883±6.730bc	20.3±0.006m	16.240±0.352fg
03046	3.550±.087f	12.603±0.540jkl	199.707±2.723hi	24.3±0.006bcd	17.353±0.248cd
04670	2.617±0.061j	18.857±0.520d	234.573±2.406fg	21.3±0.006kl	16.530±0.576efg
04679	3.707±0.059e	13.597±0.086i	254.350±9.450cd	20.7±0.006lm	15.433±0.276h
05689	3.217±0.100hi	19.050±0.563d	228.710±8.680g	20.3±0.006m	14.670±0.342i
05690	2.260±0.061l	17.340±0.646e	248.173±6.763de	21.3±0.006kl	15.347±0.671h
07880	3.690±0.082e	14.783±0.426gh	235.963±2.325efg	22.7±0.006ghi	13.997±0.616ijk
08515	1.383±0.006o	12.783±0.330jk	268.300±3.350ab	18.7±0.006n	13.443±0.601k
08516	1.597±0.006n	14.363±0.272h	270.613±6.053ab	22.0±0.000ijk	15.877±0.251gh
08517	3.933±0.046d	12.293±0.229klm	239.830±8.133efg	21.7±0.006jk	22.053±0.202a
08518	4.937±0.151a	12.033±0.172klm	243.020±6.802def	20.3±0.006m	14.157±0.407ij
08519	1.663±0.070n	30.093±0.331a	205.053±7.790hi	26.3±0.006a	16.927±0.336de
08520	3.147±0.085i	26.277±0.907b	210.320±6.329h	24.0±0.000cde	17.940±0.448c
08521	2.237±0.081l	20.053±0.855c	196.283±2.703i	23.7±0.006def	14.607±0.237i
B08	3.303±0.040gh	12.397±0.382jkl	263.667±1.557abc	23.0±0.000fgh	16.403±0.191efg
