# Supplementary material for: Integrated Phenotypic, Nutritional, and SSR Marker Analyses Reveal Genetic Diversity and Guide Germplasm Utilization in Lotus corniculatus
Source: Research Square preprint supplement (doi:10.21203/rs.3.rs-7373284/v1), 2025-10-03
Supplement: Supplementary file 2 [file f6482ff460053cfd7cd0858a.docx]

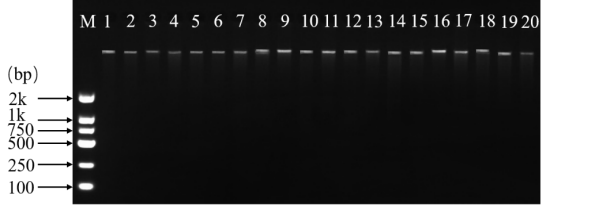


**Fig. S1** PCR amplification detection of *Lotus corniculatus* genomic DNA


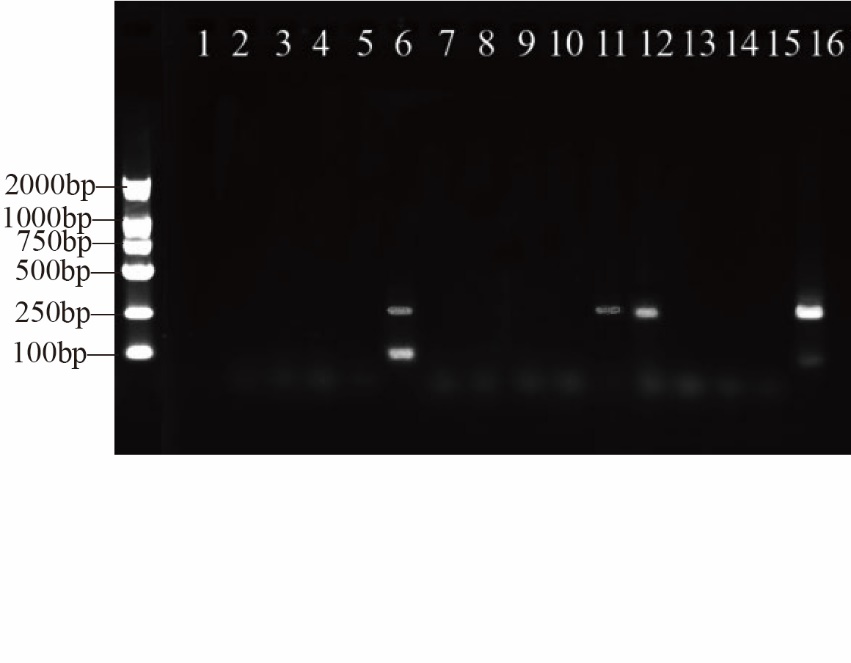


**Fig. S2** Gel electrophoresis profiles for optimization of the SSR-PCR reaction system


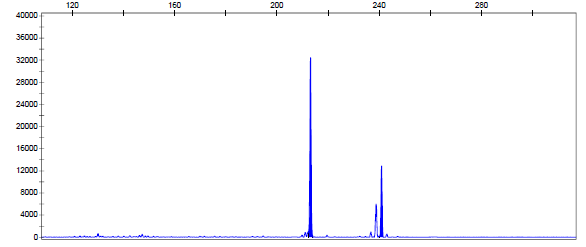

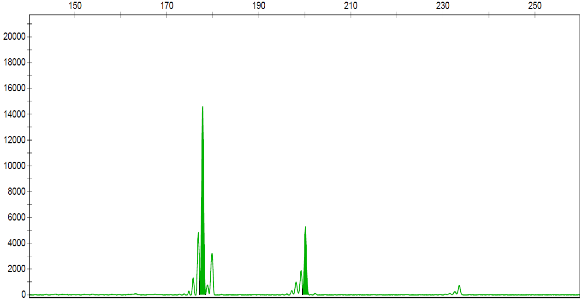


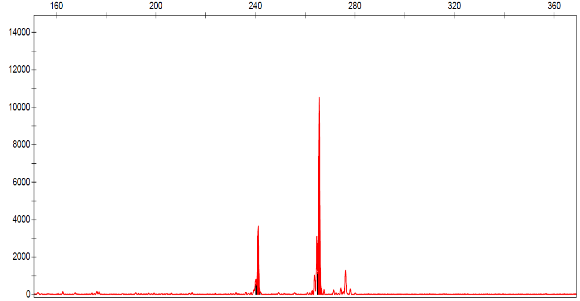

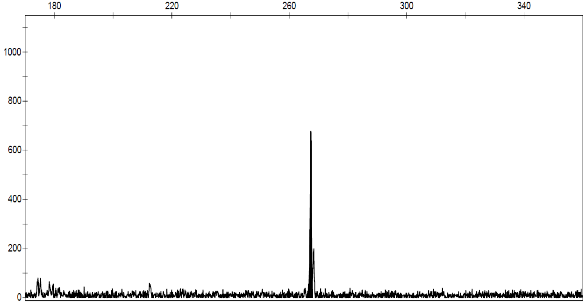


**Fig. S3** Representative capillary electrophoresis peak profiles for SSR markers labeled with FAM (blue), HEX (green), ROX (red), and TAMRA (black)
